# Supplementary material for: Rising sclerophylly in the Amazon over the last four decades
Source: Research Square preprint supplement (doi:10.21203/rs.3.rs-5573817/v1), 2025-01-09
Supplement: Supplementary file 2 [file 9b49a6b7063b7de6a9376688.pdf]

## Supplementary Material

**Table S1 | Amazon Vegetation Sites.** Approximate location and elevation of the 130 sites within the Amazon biome used in the study.

| Country       | Site code         | Site Name                                          | Elevation | Latitude | Longitude |
|---------------|-------------------|----------------------------------------------------|-----------|----------|-----------|
| Bolivia       | Bolivia-CRP       | Cerro Pelao                                        | 350       | -14.54   | -61.50    |
| Bolivia       | Bolivia-LFB       | Los Fierros Bosque                                 | 245       | -14.58   | -60.83    |
| Bolivia       | Bolivia-LSL       | Las Londras                                        | 190       | -14.40   | -61.14    |
| Bolivia       | Bolivia-RET       | Reserva El Tigre                                   | 160       | -10.97   | -65.72    |
| Bolivia       | Bolivia-SCT       | Sacta                                              | 248       | -17.09   | -64.77    |
| Brazil        | Brazil-AFL        | Alta Floresta                                      | 275       | -9.62    | -55.89    |
| Brazil        | Brazil-BDF        | BDFFP project                                      | 75        | -2.34    | -59.85    |
| Brazil        | Brazil-CAX        | Caxiuana                                           | 15        | -1.74    | -51.46    |
| Brazil        | Brazil-DOI        | RESEX Chico Mendes: Seringal Dois Irmãos           | 203       | -10.55   | -68.31    |
| Brazil        | Brazil-FEC        | Fazenda Experimental Catuaba                       | 204       | -10.07   | -67.62    |
| Brazil        | Brazil-FLO        | Fazenda Floresta                                   | 377       | -12.81   | -51.85    |
| Brazil        | Brazil-MIN        | Rio das Minas, Parque Nacional da Serra do Divisor | 226       | -8.57    | -72.90    |
| Brazil        | Brazil-MTH        | Marechal Thaumaturgo, Alto Rio Juruá               | 246       | -8.88    | -72.79    |
| Brazil        | Brazil-POR        | RESEX Chico Mendes: Seringal Porongaba             | 268       | -10.80   | -68.77    |
| Brazil        | Brazil-RFH        | Reserva Florestal Humaita                          | 176       | -9.75    | -67.67    |
| Brazil        | Brazil-RST        | Reserva Extrativista do Alto Juruá                 | 279       | -9.04    | -72.27    |
| Brazil        | Brazil-SIP        | Fazenda Continental, Sinop                         | 385       | -11.41   | -55.32    |
| Brazil        | Brazil-SMT        | Fazenda Santa Marta, Ribeirão Cascalheira          | 332       | -12.82   | -51.77    |
| Brazil        | Brazil-TEC        | TEAM Caxiuana                                      | 15        | -1.71    | -51.43    |
| Colombia      | Colombia-AGP      | Amacayacu: Agua Pudre                              | 120       | -3.72    | -70.30    |
| Colombia      | Colombia-LOR      | Amacayacu: Lorena                                  | 94        | -3.06    | -69.99    |
| Ecuador       | Ecuador-BOG       | Bogi                                               | 284       | -0.70    | -76.47    |
| Ecuador       | Ecuador-TIP       | Tiputini                                           | 250       | -0.63    | -76.14    |
| French Guiana | French Guiana-NOU | Nouragues Petit Plateau                            | 127       | 4.09     | -52.67    |
| French Guiana | French Guiana-PAB | Paracou                                            | 40        | 5.27     | -52.92    |
| French Guiana | French Guiana-PAR | Guyaflux                                           | 35        | 5.28     | -52.92    |
| Guyana        | Guyana-FMH        | Forest reserve Mabura                              | 122       | 5.18     | -58.69    |
| Guyana        | Guyana-IWO        | Iwokrama                                           | 139       | 4.63     | -58.72    |
| Guyana        | Guyana-PIB        | Pibiri                                             | 94        | 5.03     | -58.60    |
| Peru          | Peru-AGJ          | Aguajal                                            | 300       | -11.89   | -71.36    |
| Peru          | Peru-ALP          | Allpahuayo                                         | 130       | -3.95    | -73.43    |
| Peru          | Peru-BAR          | Barranco                                           | 345       | -11.90   | -71.42    |
| Peru          | Peru-CUZ          | Cuzco Amazonico                                    | 190       | -12.53   | -69.05    |
| Peru          | Peru-JEN          | Jenaro Herrera                                     | 151       | -4.88    | -73.63    |
| Peru          | Peru-LAS          | Los Amigos                                         | 280       | -12.55   | -70.09    |
| Peru          | Peru-MNU          | Manu                                               | 358       | -11.88   | -71.21    |
| Peru          | Peru-PAK          | Pakitza                                            | 347       | -11.94   | -71.27    |
| Peru          | Peru-SUC          | Sucusari                                           | 118       | -3.25    | -72.89    |

|           |               |                         |     |        |        |
|-----------|---------------|-------------------------|-----|--------|--------|
| Peru      | Peru-TAM      | Tambopata               | 225 | -12.83 | -69.26 |
| Peru      | Peru-YAN      | Yanamono                | 132 | -3.43  | -72.84 |
| Suriname  | Suriname-KAB  | Kabo                    | 58  | 5.26   | -55.77 |
| Venezuela | Venezuela-ELD | El Dorado               | 404 | 6.11   | -61.40 |
| Venezuela | Venezuela-RIO | Rio Grande              | 318 | 8.11   | -61.69 |
| Venezuela | Venezuela-SCR | San Carlos de Rio Negro | 105 | 1.93   | -67.04 |

---

**Table S2 | Stepwise model selection.** Models are ranked based on their optimal balance between explanatory power and complexity (lower AIC).

| <b>Nova Xavantina - Global model: CV of blue ~ sla : season + (1   plot)</b>                                                      |             |        |                    |               |                        |           |           |          |           |        |
|-----------------------------------------------------------------------------------------------------------------------------------|-------------|--------|--------------------|---------------|------------------------|-----------|-----------|----------|-----------|--------|
| Model                                                                                                                             | (Intercept) | season | sla                | season : sla  | df                     | logLik    | AIC       | delta    | weight    |        |
| 8.000                                                                                                                             | 0.997       | +      | 0.016              | +             | 7                      | -5694.029 | 11402.059 | 0.000    | 1         |        |
| 4.000                                                                                                                             | 1.751       | +      | 0.007              | NA            | 6                      | -5751.060 | 11514.120 | 112.061  | 4.64E-25  |        |
| 2.000                                                                                                                             | 2.402       | +      | NA                 | NA            | 5                      | -5795.112 | 11600.223 | 198.164  | 9.31E-44  |        |
| 3.000                                                                                                                             | 2.090       | NA     | 0.007              | NA            | 5                      | -5948.607 | 11907.215 | 505.156  | 2.03E-110 |        |
| 1.000                                                                                                                             | 2.659       | NA     | NA                 | NA            | 4                      | -5980.436 | 11968.871 | 566.813  | 8.28E-124 |        |
| <b>Amazon - Global model: CV of blue ~ sla : season + esi : season + evap : season + wue : season + (1   region) + (1   plot)</b> |             |        |                    |               |                        |           |           |          |           |        |
| Model                                                                                                                             | (Intercept) | esi    | evapotranspiration | sla           | wue                    | df        | logLik    | AIC      | delta     | weight |
| 11                                                                                                                                | 30.742      | NA     | -0.016             | 0.243         | NA                     | 6         | -2979.864 | 5971.728 | 0.000     | 0.084  |
| 9                                                                                                                                 | 25.031      | NA     | NA                 | 0.239         | NA                     | 5         | -2980.881 | 5971.762 | 0.033     | 0.082  |
| 12                                                                                                                                | 17.936      | 15.450 | -0.017             | 0.238         | NA                     | 7         | -2979.643 | 5973.286 | 1.558     | 0.038  |
| 27                                                                                                                                | 30.152      | NA     | -0.018             | 0.234         | 2.224                  | 7         | -2979.675 | 5973.351 | 1.622     | 0.037  |
| <b>Amazon - Global model: CV of blue ~ year : season : region + (1   plot)</b>                                                    |             |        |                    |               |                        |           |           |          |           |        |
| Model                                                                                                                             | (Intercept) | year   | region : year      | season : year | region : season : year | df        | logLik    | AIC      | delta     | weight |

|     |        |        |    |    |    |     |            |           |        |          |
|-----|--------|--------|----|----|----|-----|------------|-----------|--------|----------|
| 128 | 56.041 | -0.025 | +  | +  | +  | 178 | -15924.856 | 32205.713 | 0      | 0.999    |
| 64  | 14.209 | -0.005 | +  | +  | NA | 135 | -15974.914 | 32219.827 | 14.114 | 0.001    |
| 32  | 0.357  | 0.002  | +  | NA | NA | 134 | -15980.716 | 32229.432 | 23.720 | 7.06E-06 |
| 48  | 51.070 | -0.023 | NA | +  | NA | 92  | -16028.632 | 32241.265 | 35.552 | 1.90E-08 |

---

**Amazon - Global model: % Δ CV of Blue ~ region + season + region : season**

---

| Model | (Intercept) | region | season | region : season | df | logLik    | AIC      | delta  | weight   |
|-------|-------------|--------|--------|-----------------|----|-----------|----------|--------|----------|
| 8     | -51.291     | +      | +      | +               | 81 | -962.080  | 2086.160 | 0.000  | 0.999    |
| 3     | -5.418      | NA     | +      | NA              | 3  | -1047.411 | 2100.821 | 14.661 | 0.001    |
| 1     | 4.181       | NA     | NA     | NA              | 2  | -1055.185 | 2114.370 | 28.210 | 7.48E-07 |
| 4     | -31.669     | +      | +      | NA              | 44 | -1020.036 | 2128.072 | 41.912 | 7.92E-10 |
| 2     | -19.521     | +      | NA     | NA              | 43 | -1032.007 | 2150.013 | 63.853 | 1.36E-14 |

---

**Amazon - Global model : % Δ CV of Blue ~ PC1 : season + PC2 : season + PC3 : season + (1 | region)**

---

| Model | (Intercept) | PC1    | PC2 | PC3    | season | PC1 : season | PC2 : season | PC3 : season | df | logLik    | AIC    | delta | weight |
|-------|-------------|--------|-----|--------|--------|--------------|--------------|--------------|----|-----------|--------|-------|--------|
| 26    | -4.363      | -5.018 | NA  | NA     | +      | +            | NA           | NA           | 6  | -1041.095 | 2094.2 | 0     | 0.283  |
| 30    | -4.319      | -4.934 | NA  | -3.062 | +      | +            | NA           | NA           | 7  | -1040.142 | 2094.3 | 0.1   | 0.27   |
| 94    | -4.475      | -4.972 | NA  | -4.383 | +      | +            | NA           | +            | 8  | -1039.82  | 2095.6 | 1.45  | 0.137  |

|    |        |        |        |    |   |   |    |    |   |          |        |      |       |
|----|--------|--------|--------|----|---|---|----|----|---|----------|--------|------|-------|
| 28 | -4.416 | -4.942 | 0.5619 | NA | + | + | NA | NA | 7 | -1041.05 | 2096.1 | 1.91 | 0.109 |
|----|--------|--------|--------|----|---|---|----|----|---|----------|--------|------|-------|

---

CV = Coefficient of Variation; SLA = Specific Leaf Area; ESI = Evaporative Stress Index; WUE = Water Use Efficiency; Evap = Evapotranspiration.

**Table S3 | Climatic and hydrological indicators obtained from TerraClimate.**

| Variable                                    | Description                                                                                           | Units            | Relevance to Study                                                                                                        |
|---------------------------------------------|-------------------------------------------------------------------------------------------------------|------------------|---------------------------------------------------------------------------------------------------------------------------|
| aet (Actual Evapotranspiration)             | Monthly total amount of water evaporated from the soil and transpired by plants                       | mm               | Influences water availability for plant growth; changes in evapotranspiration affect vegetation water requirements        |
| def (Climate Water Deficit)                 | Monthly total deficit between potential evapotranspiration and actual evapotranspiration              | mm               | Indicates water stress conditions; negative def values suggest drier conditions impacting vegetation                      |
| PDSI (Palmer Drought Severity Index)        | Palmer drought severity index at the end of the month                                                 | unitless         | Reflects drought severity; negative values indicate drier conditions potentially impacting vegetation health              |
| pet (Potential Evapotranspiration)          | Monthly total maximum amount of water that could be evaporated from the soil and transpired by plants | mm               | Reflects the maximum evaporative demand under current climate conditions; changes may indicate shifts in climate patterns |
| pr (Precipitation)                          | Monthly total amount of precipitation, influencing water availability for plant growth                | mm               | Directly impacts water supply for vegetation; changes in precipitation patterns can impact plant health                   |
| ro (Runoff)                                 | Monthly total amount of water that flows over the land surface                                        | mm               | Changes in runoff can affect soil moisture levels, influencing vegetation health                                          |
| soil (Soil Moisture)                        | Total column soil moisture at the end of the month                                                    | mm               | Soil properties influence nutrient availability and plant growth                                                          |
| srad (Downward Surface Shortwave Radiation) | Monthly total solar radiation reaching the Earth's surface, essential for photosynthesis              | W/m <sup>2</sup> | Directly impacts energy available for plant processes; changes in radiation affect vegetation growth                      |
| tmmn (Min Temperature)                      | Average minimum temperature for the month                                                             | °C               | Temperature influences various aspects of plant metabolism and growth                                                     |
| tmmx (Max Temperature)                      | Average maximum temperature for the month                                                             | °C               | Higher temperatures can influence plant physiology and growth                                                             |
| vap (Vapor Pressure)                        | Average vapour pressure for the month, related to humidity                                            | kPa              | Influences plant transpiration; reflects atmospheric moisture conditions                                                  |
| vpd (Vapor Pressure Deficit)                | Average vapour pressure deficit for the month                                                         | kPa              | Reflects atmospheric drying conditions; affects plant water loss                                                          |
| vs (Wind-speed at 10m)                      | Average wind speed for the month                                                                      | m/s              | Influences various ecological processes, including seed dispersal and plant responses to mechanical stress                |

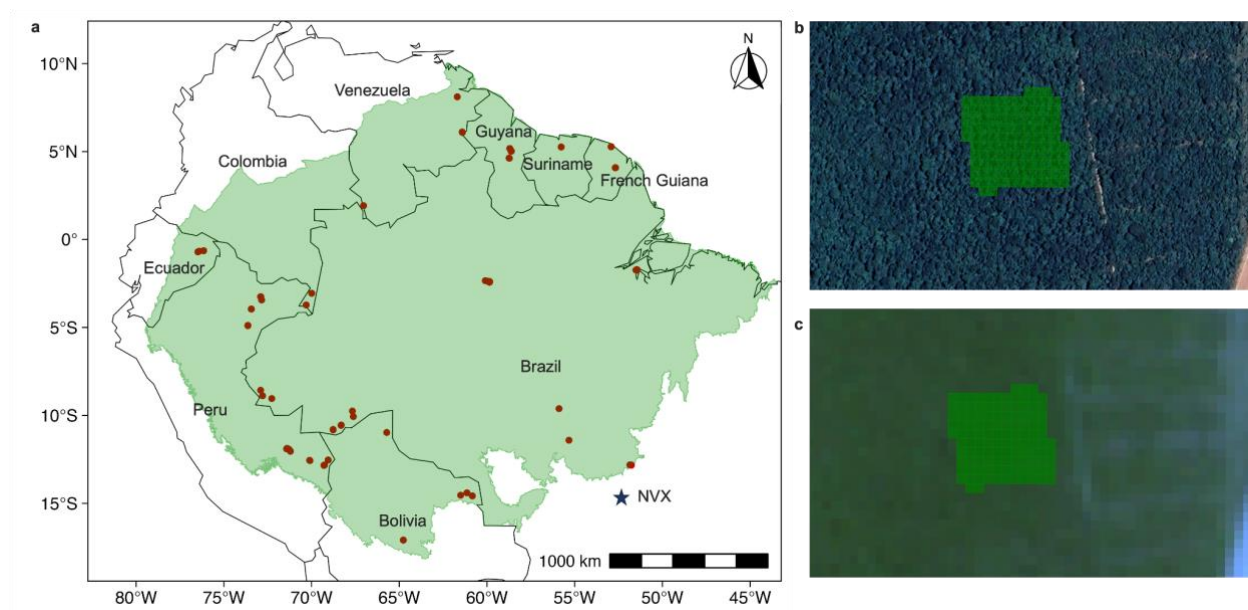

**Fig. S1 | Location of the study sites and overlap of the subplots with the satellite pixels.** **a**, Nova Xavantina plots (star), in a Cerrado-Amazon transition region in Brazil, and the Amazon vegetation sites (dots), spanning nine countries. **b**, the Nova Xavantina ‘subplots’ of 10 x 10 m, which were the unit used to calculate the trait community weighted mean based on the crown area of the trees in that pixel; and **c**, pixels of the Copernicus Sentinel-2 satellite showing the geospatial matching with the forest subplots.

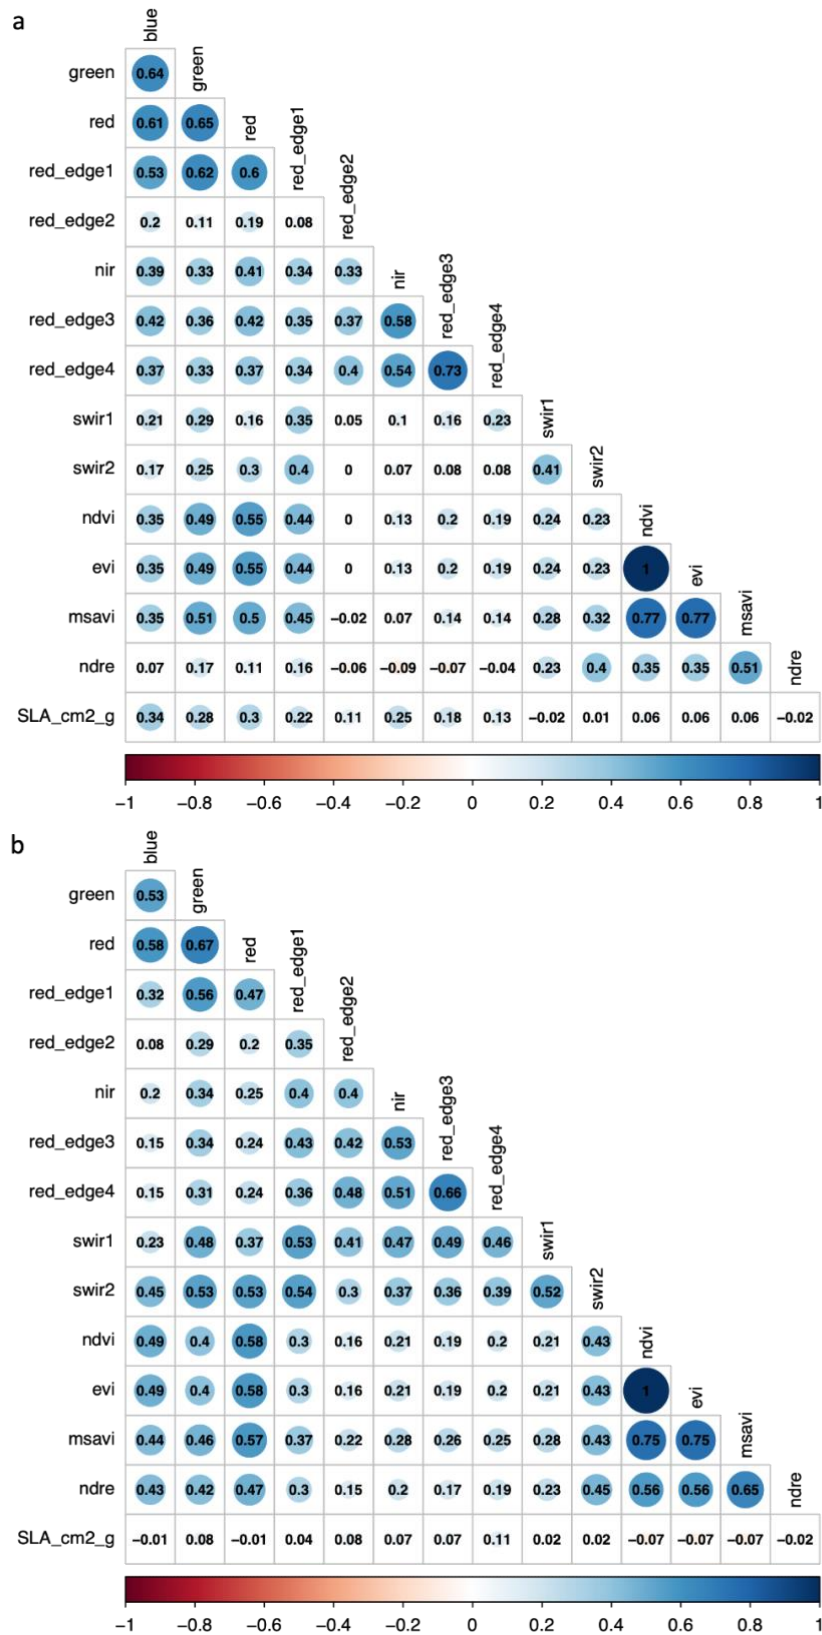

**Fig. S2 | Pearson Correlation coefficients among the trait and reflectance variables in Nova Xavantina, Brazil during the (a) dry and (b) wet seasons.** Reflectance variables are the intra-month coefficients of variation (%) over the year 2019. Asat = photosynthetic capacity at light saturated carbon assimilation rates ( $\mu\text{mol m}^{-2} \text{s}^{-1}$ ); Amax: photosynthetic capacity at maximum carbon assimilation rates ( $\mu\text{mol m}^{-2} \text{s}^{-1}$ ).



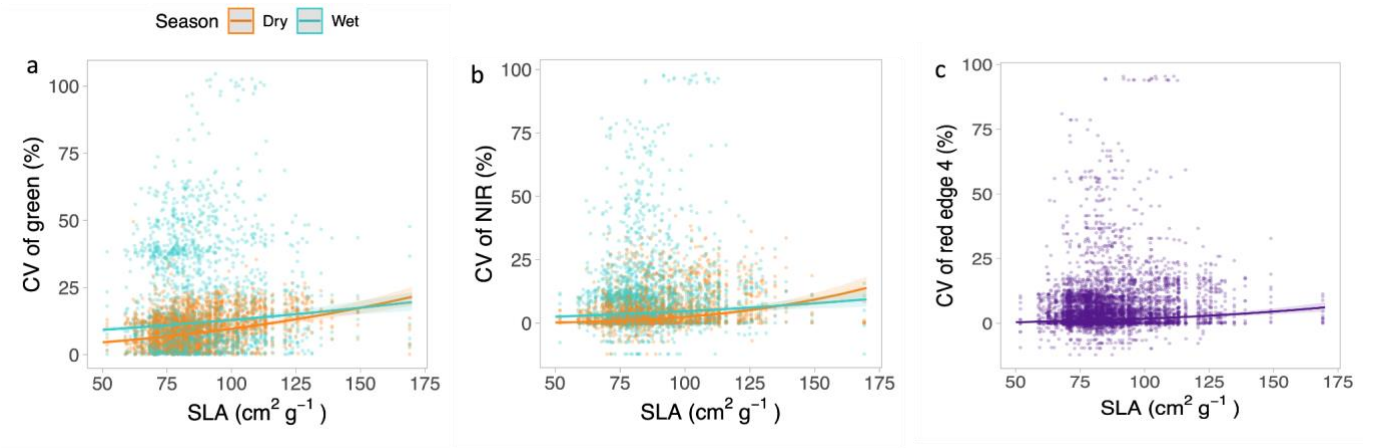

**Fig. S3 | Conditional effects of Specific Leaf Area (SLA, in cm<sup>2</sup> per g) on the intra-month variation in reflectance (CV: Coefficient of Variation in %) of the (a) green and (b) NIR wavelengths across different seasons, and (c) red edge 4 band regardless of the season in Nova Xavantina, MT, Brazil. Each line represents the fitted values of a linear mixed-effects model.**

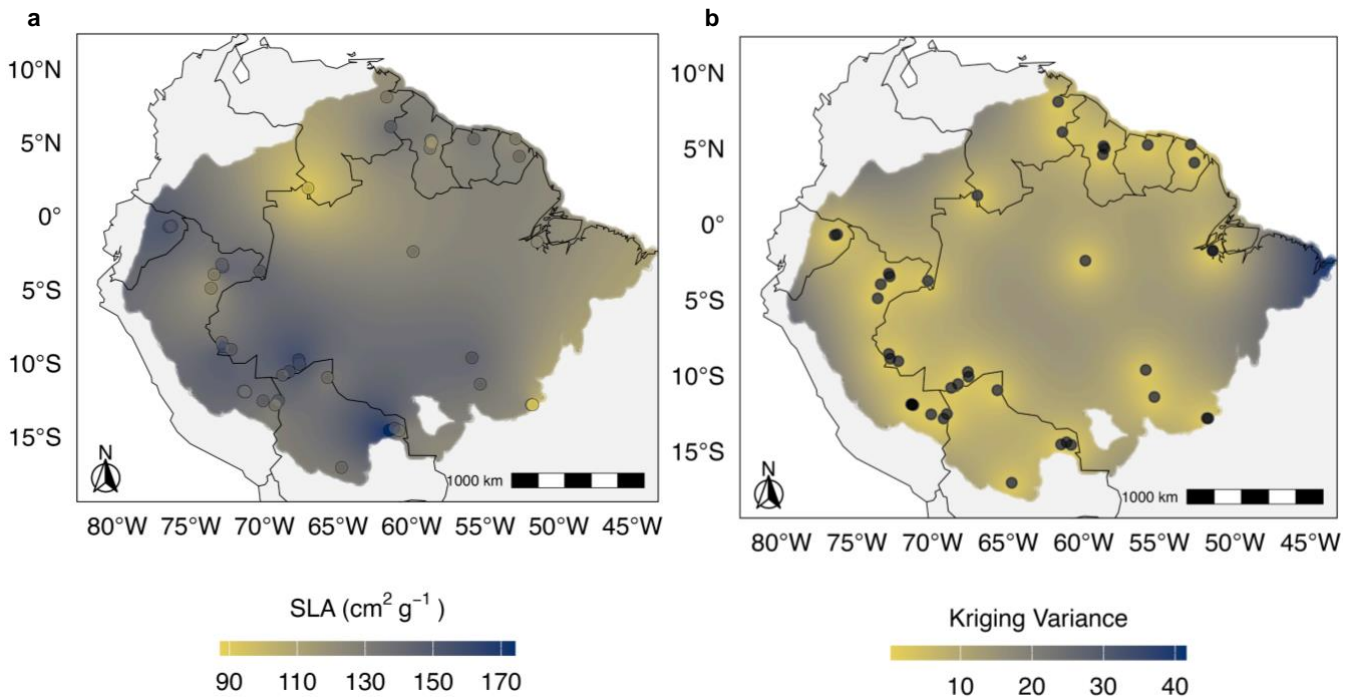

**Fig. S4 | Specific Leaf Area (SLA) for regions of the Amazon biome. a, average Community-Weighted Mean of SLA (colour) for each study region (point) and predictions for the whole biome generated using interpolation by Ordinary Kriging. b, study regions (points) and uncertainty level of interpolated predictions.**

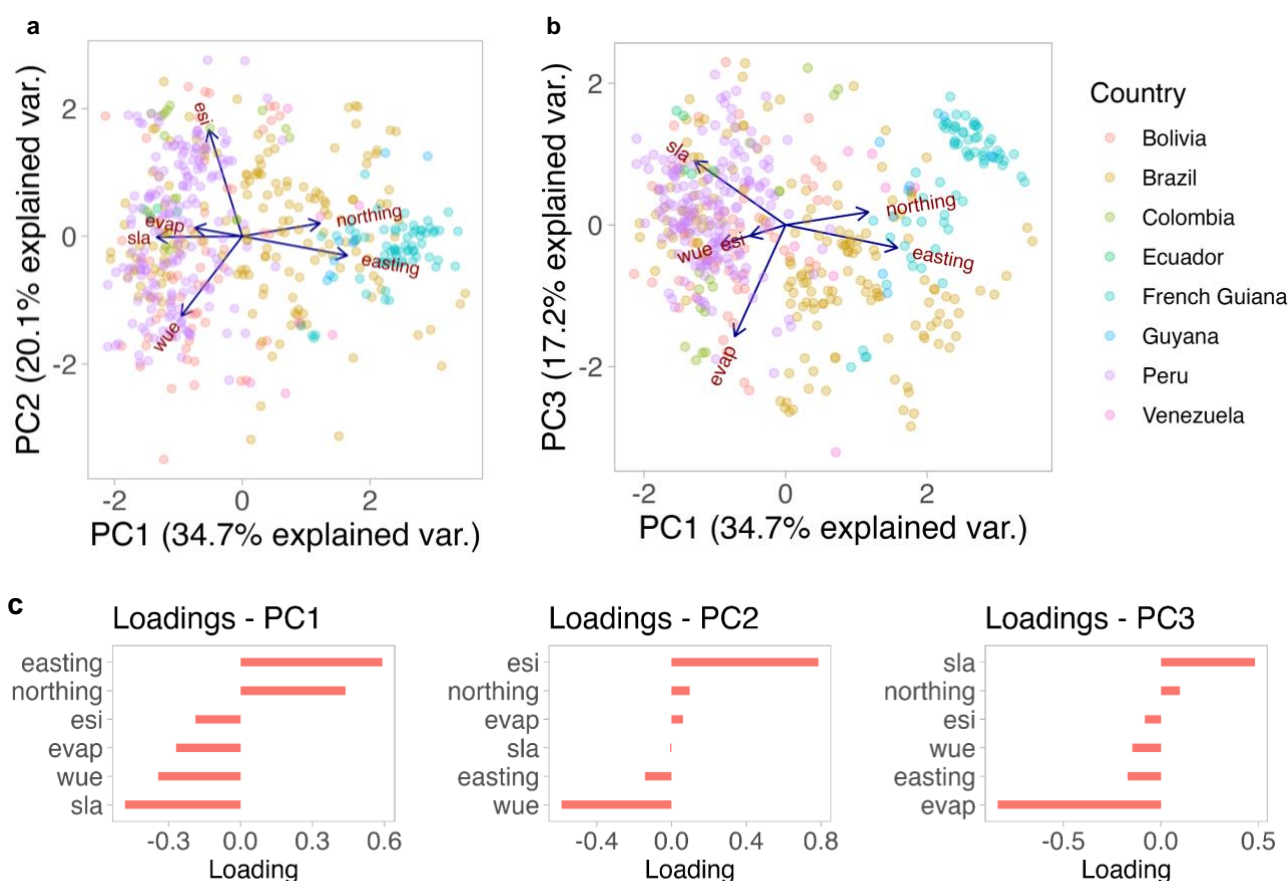

**Fig. S5 | First and second (a) and first and third (b) axis, and loadings (c) of a Principal Component Analysis (PCA) calculated on normalised variables for Amazon sites.** SLA = Specific Leaf Area; WUE = Water Use Efficiency; ESI = Evaporative Stress Index (high values mean low stress); Evap = Evapotranspiration; easting = Longitudinal degrees; and northing = Latitudinal degrees. Hydraulic variables are the month means over the years 2019-2022.

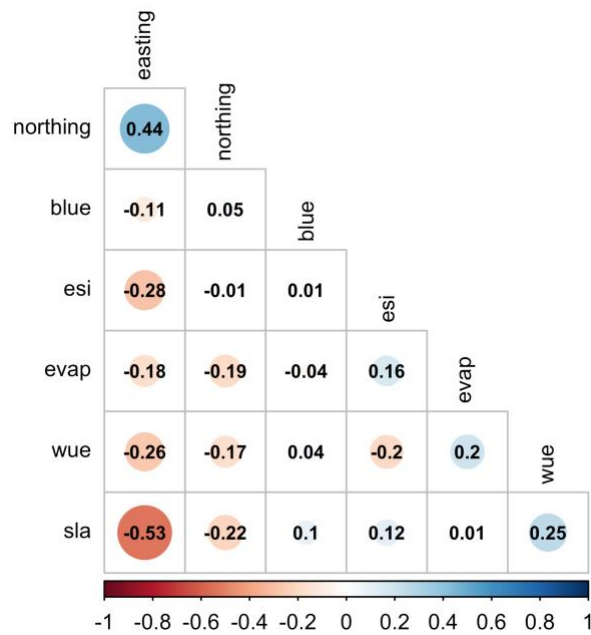

**Fig. S6 | Pearson Correlation coefficients between SLA, spectral, and hydraulic variables in 130 Amazon sites.** SLA= Specific Leaf Area; WUE = Water Use Efficiency; ESI = Evaporative Stress Index; Evap = Evapotranspiration; Easting = Longitudinal degrees; and Northing = Latitudinal degrees; blue = intra-month coefficient of variation (CV in %) for the year 2019. Hydraulic variables are the month means across the years 2019-2022.

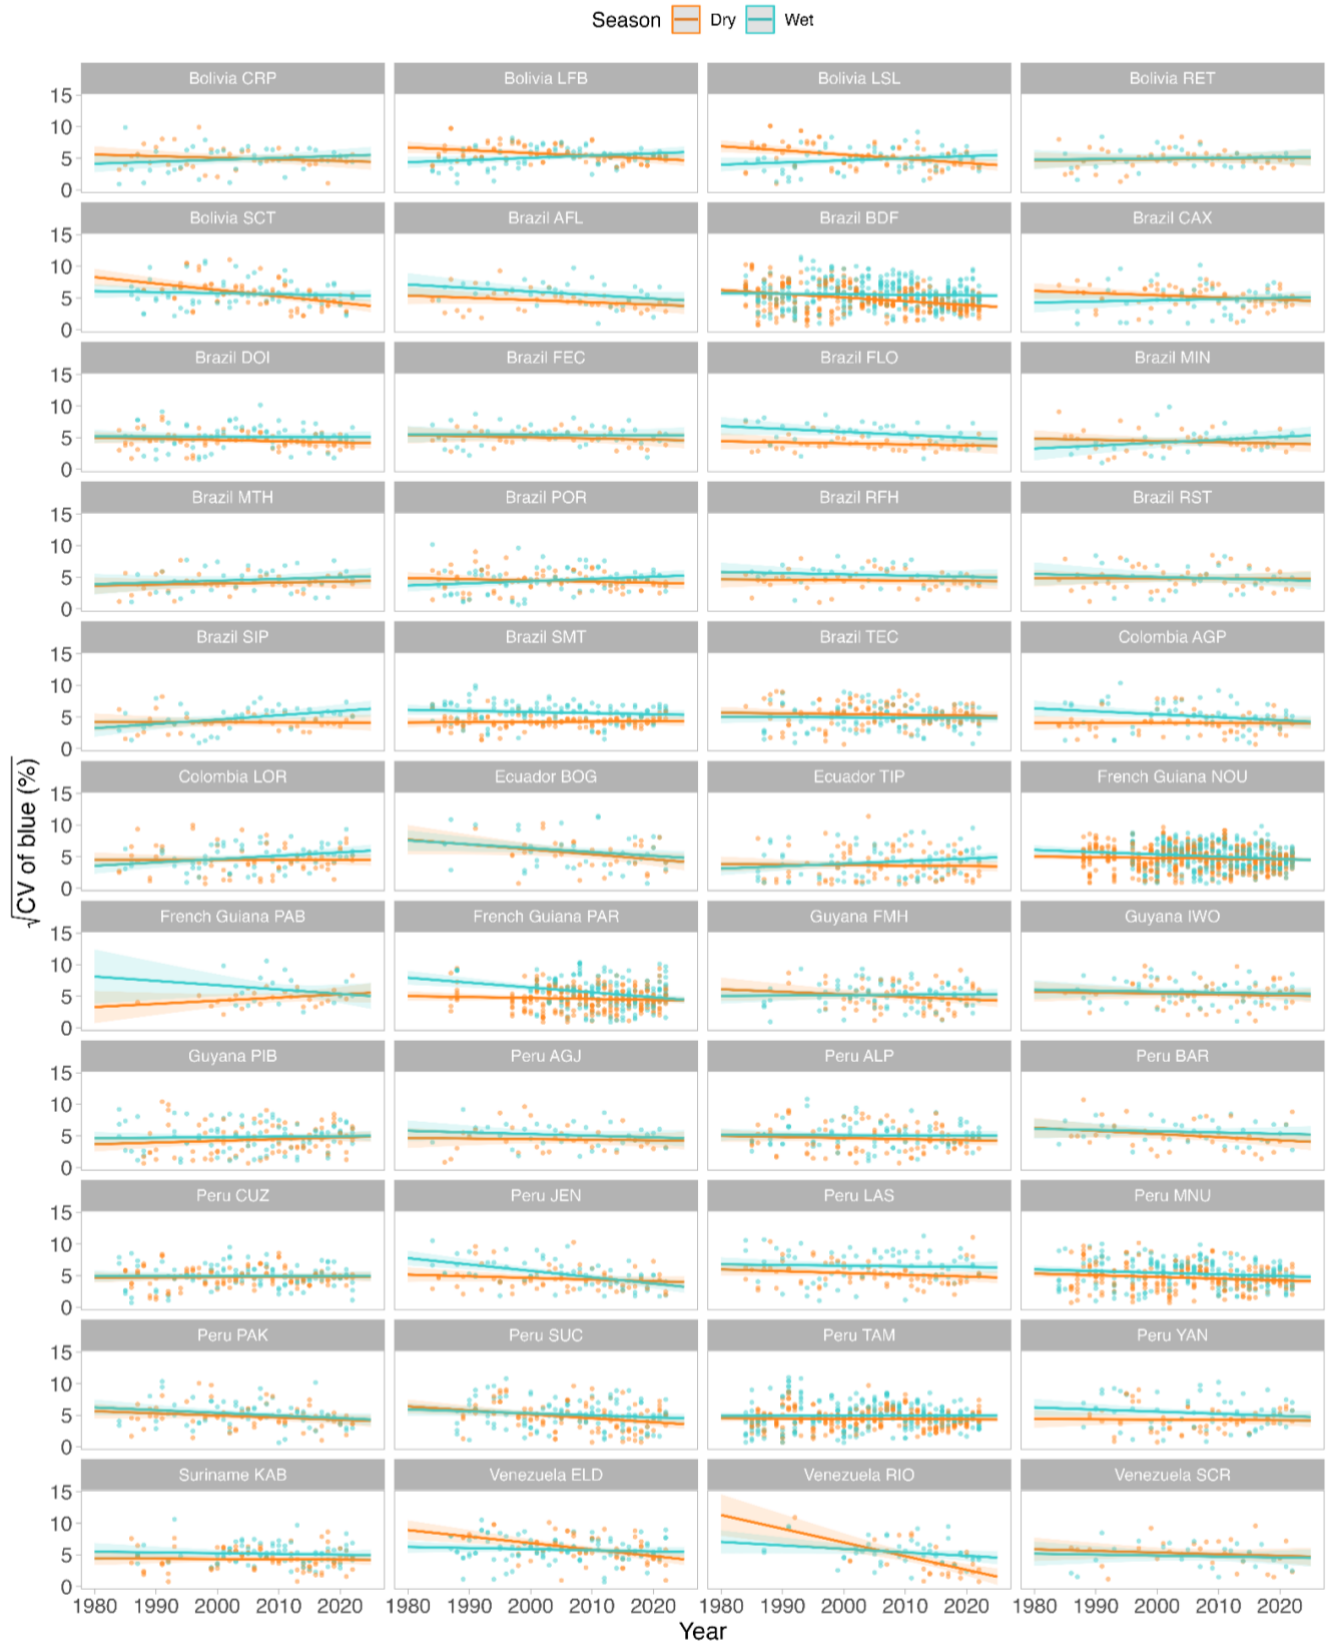

**Fig. S7 | Predicted Yearly Trends in the Coefficient of Variation (CV in %) of reflectance at the blue wavelength by season and regions of the Amazon biome.** Each dot represents a data point for a particular plot in the Amazon Forest. The lines and shaded areas depict the model-predicted values and their confidence intervals, respectively. Predictions and intervals have not been back-transformed and are presented in square root scale.

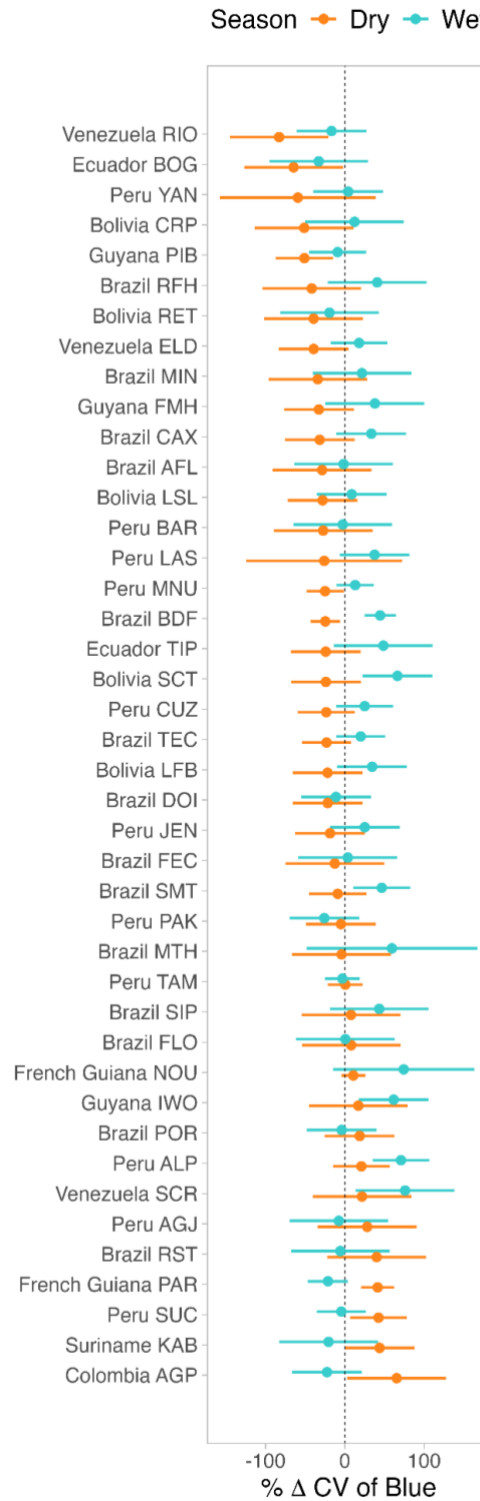

**Fig. S8 | Predicted per cent change in the within-season variation of the blue reflectance (%  $\Delta$  CV of Blue) between the periods 1984-1993 and 2013-2022 by season and region of the Amazon biome.** Each point and line represent a model-predicted value and their confidence intervals, respectively.

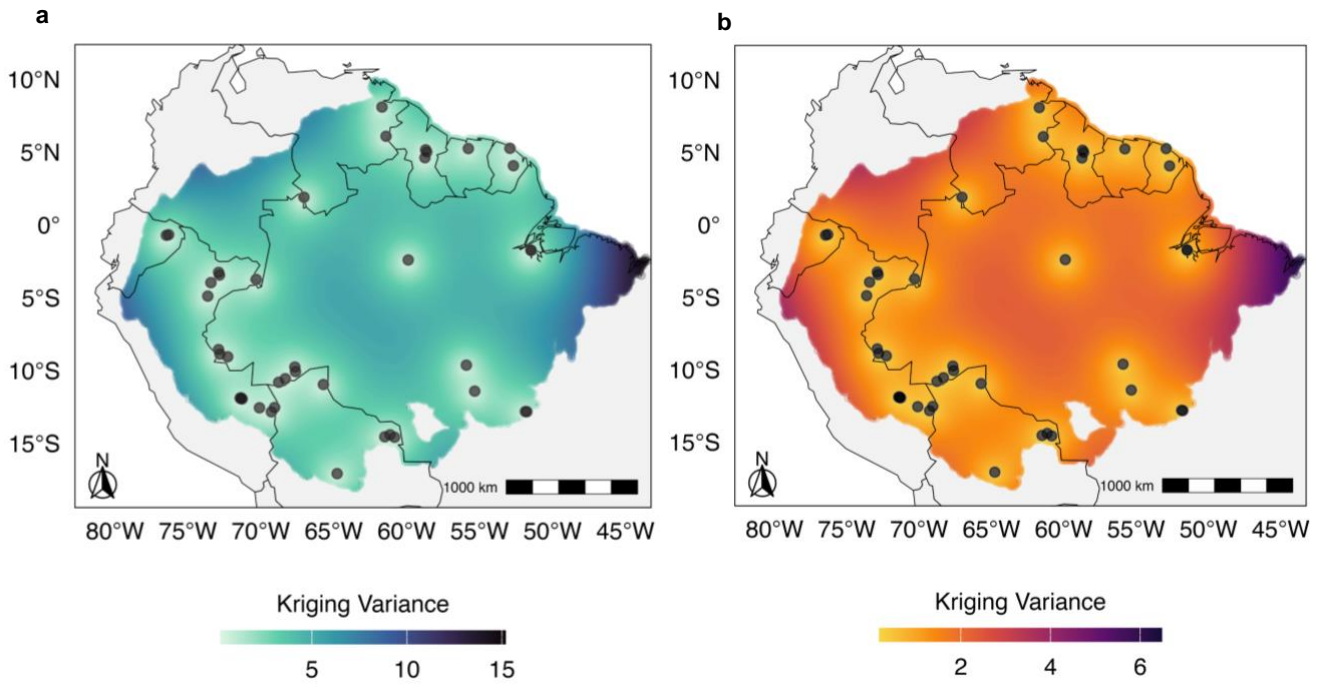

**Fig. S9 | Uncertainty levels of interpolated predictions using Ordinary Kriging.** **a**, uncertainty around the predictions of per cent change in the dry season variation of the blue reflectance ( $\% \Delta$  CV of Blue) between the periods 1984-1993 and 2013-2022 across regions of the Amazon biome (See Fig. 4 for the actual predictions). **b**, uncertainty around the predictions of change in climatic conditions ( $\Delta$  Climate stress) between the periods 1984-1993 and 2013-2022 in the Amazon biome (See Fig. 5 for the actual predictions). Points represent the study regions, with colours representing the Kriging variance.

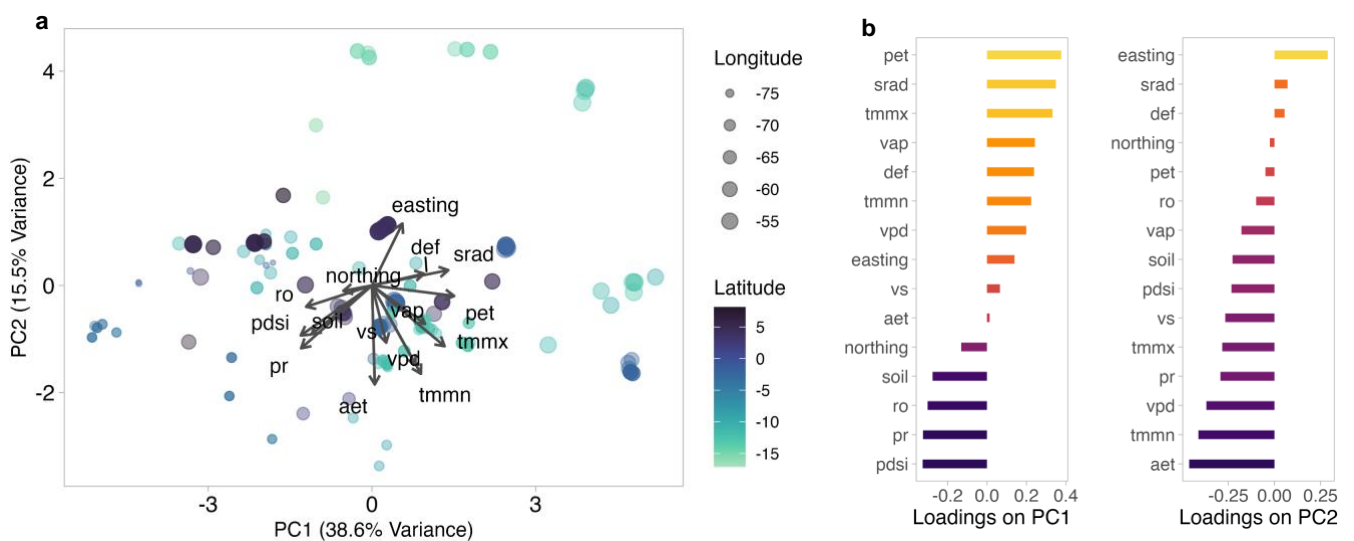

**Fig. S10 | Principal Component Analysis (PCA) of changes in climatic and hydrological factors between the periods 1984-1993 and 2013-2022 in the Amazon biome.** **a**, First and second axes of a Principal Component Analysis (PCA) on the per cent change ( $\% \Delta$ ) of climatic and hydrological factors for the Amazon sites. Each point



represents a site in the Amazon biome, colour-coded by latitude and size-coded by longitude. **b**, loadings of PC1 and PC2 of each climatic and hydraulic variable from TerraClimate, which are their per cent variation in the annual mean between the periods 1984-1993 and 2013-2022 (See Table S3 for variable descriptions). aet = Actual Evapotranspiration; def = Climate Water Deficit; PDSI = Palmer Drought Severity Index; pet = Potential Evapotranspiration; pr = Precipitation; ro = Runoff; soil = Soil Moisture; srad = Downward Surface Shortwave Radiation; tmmn = Min Temperature; tmmx = Max Temperature; vap = Vapor Pressure; vpd = Vapor Pressure Deficit; vs = Wind-speed at 10m; easting = Longitudinal degrees; northing = Latitudinal degrees.

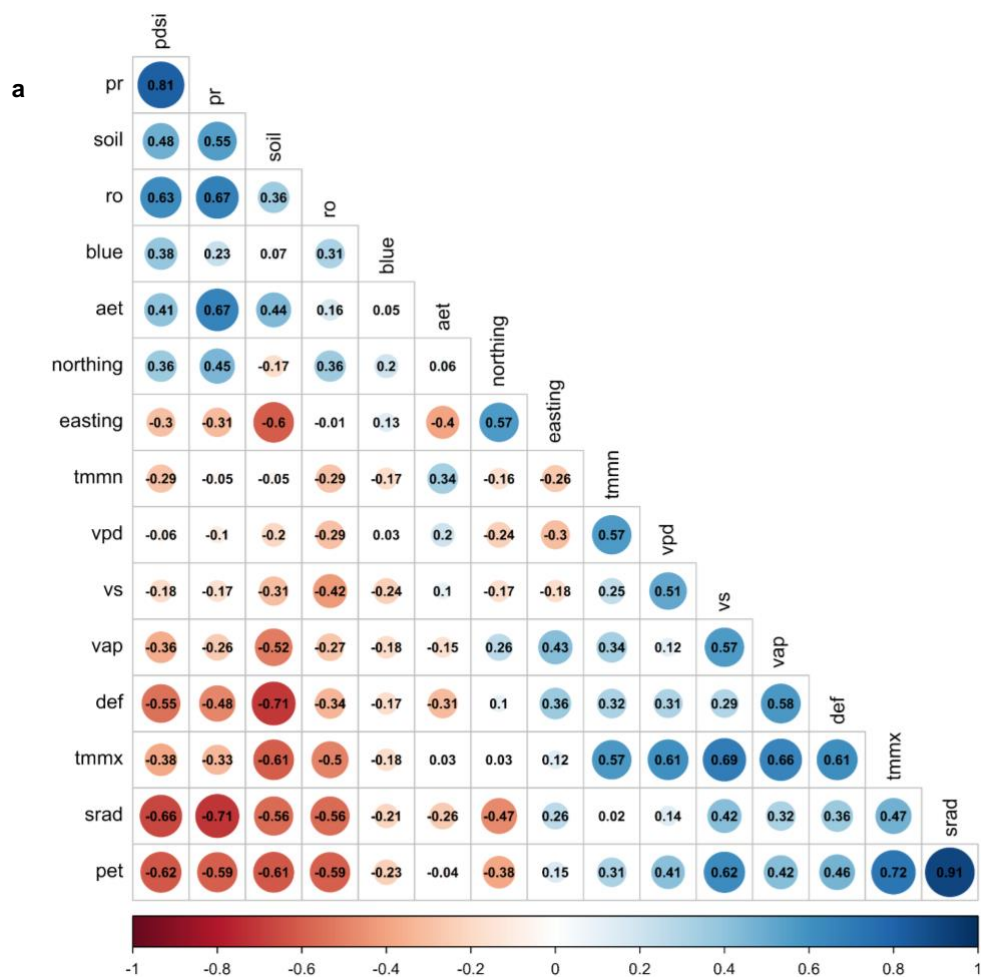

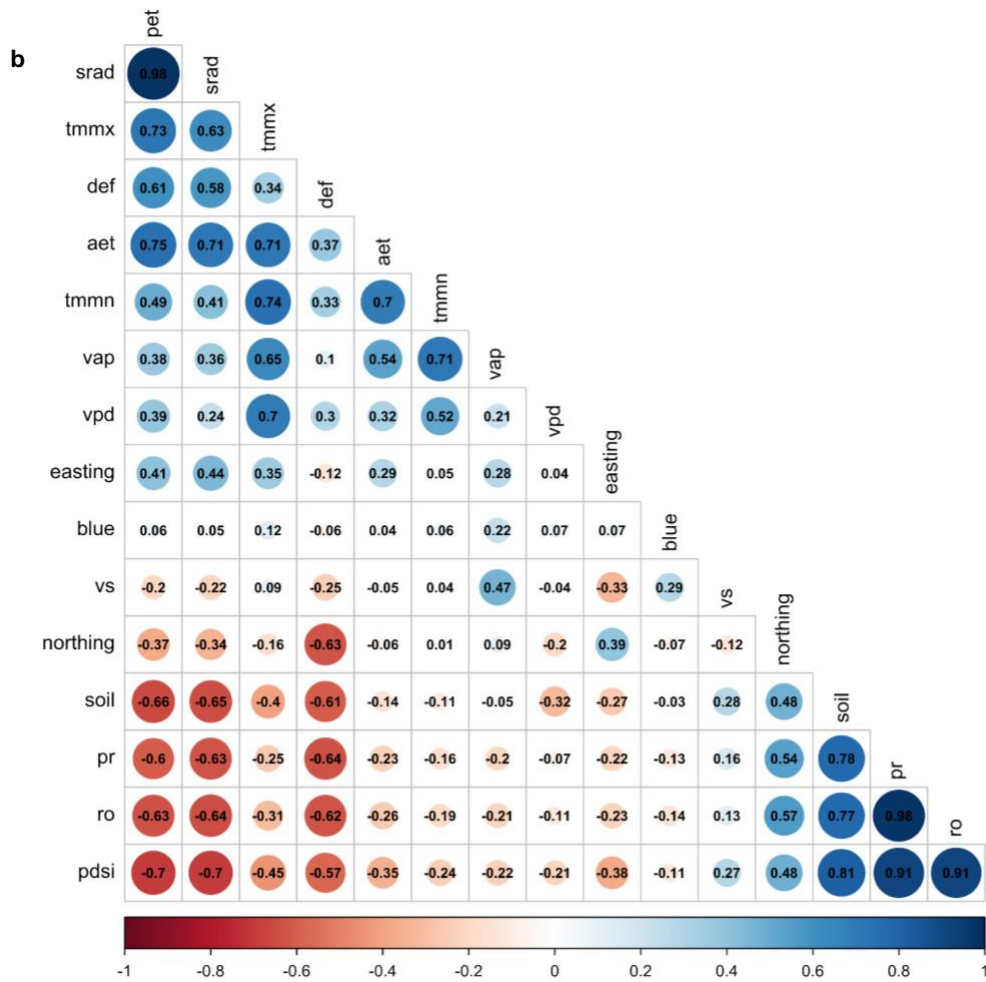

**Fig. S11 | Pearson Correlation coefficients between the delta variation in the season mean of spectral, climatic, and hydraulic variables between the periods 1984-1993 and 2013-2022 in Amazon sites, during the (a) dry and (b) wet seasons.** aet = Actual Evapotranspiration; def = Climate Water Deficit; PDSI = Palmer Drought Severity Index; pet = Potential Evapotranspiration; pr = Precipitation; ro = Runoff; soil = Soil Moisture; srad = Downward Surface Shortwave Radiation; tmmn = Min Temperature; tmmx = Max Temperature; vap = Vapor Pressure; vpd = Vapor Pressure Deficit; vs = Wind-speed at 10m; easting = Longitudinal degrees; northing = Latitudinal degrees. See Table S2 for variable descriptions.
